# Supplementary material for: Nickel-doped Co3O4 spinel nanospheres embedded in nitrogen-doped carbon composites derived from bimetallic NiCo metal–organic framework as a high-performance asymmetric supercapacitor
Source: Royal Society of Chemistry journal article supplement (doi:10.1039/d3nj00517h), 2023-01-01
Supplement: d3nj00517h1.pdf [file d3nj00517h1.pdf]

## **Supporting Information**

### **Nickel doped Co<sub>3</sub>O<sub>4</sub> spinel nanospheres embedded with nitrogen-doped carbon composites derived from bimetallic NiCo metal-organic framework as high-performance asymmetric supercapacitor**

*S Silambarasan<sup>a</sup>, Mani Sivakumar<sup>a</sup>, K Ram Kumar<sup>a</sup>, Zhongqing Jiang<sup>b</sup>, T Maiyalagan<sup>a,\*</sup>*

<sup>a</sup>Department of Chemistry, SRM Institute of Science and Technology, Kattankulathur, 603203, Tamil Nadu, India.

<sup>b</sup>Department of Physics, Zhejiang Sci-Tech University, Hangzhou 310018, China.

#### **Corresponding authors:**

\*T. Maiyalagan (T.M), E-mail: [maiylat@srmist.edu.in](mailto:maiylat@srmist.edu.in) & [maiyalagan@gmail.com](mailto:maiyalagan@gmail.com)

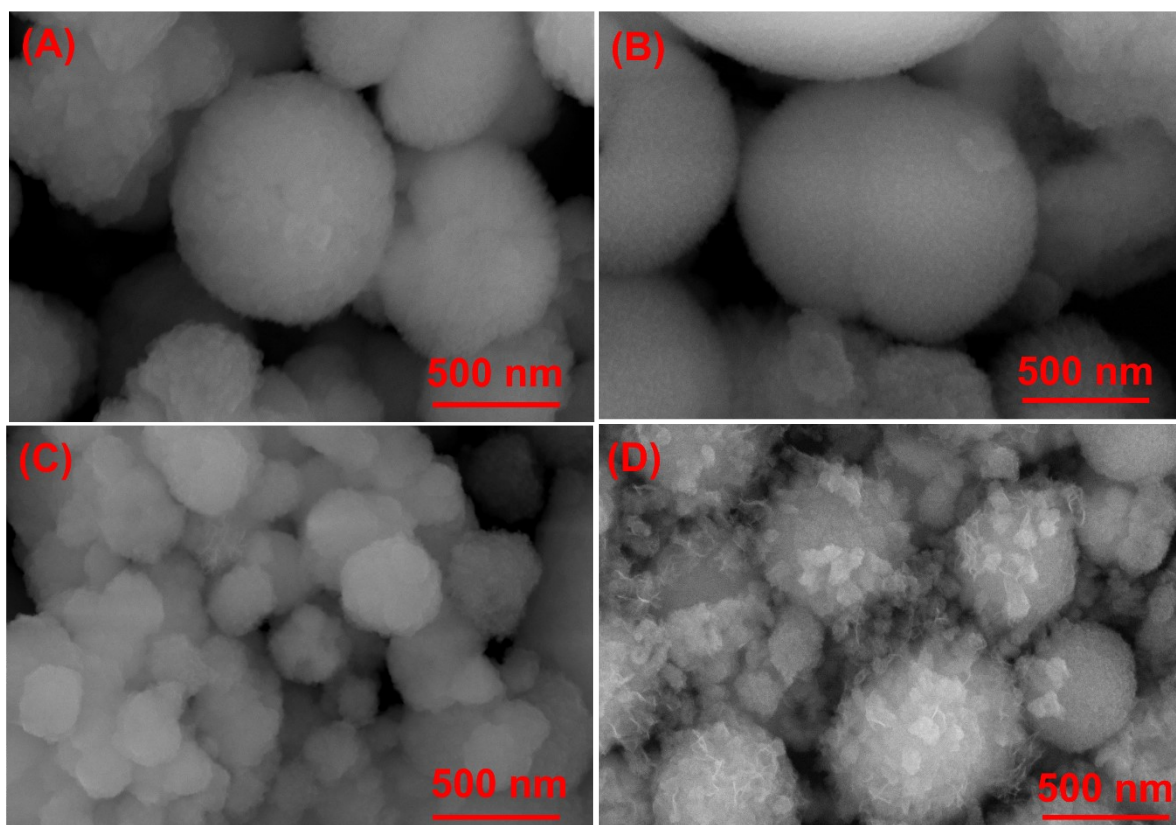

**Figure S1.** FESEM images of (A) Co-BTC, (B) NiCo-BTC-1, (C) NiCo-BTC-2, and (D) NiCo-BTC-3 sample.

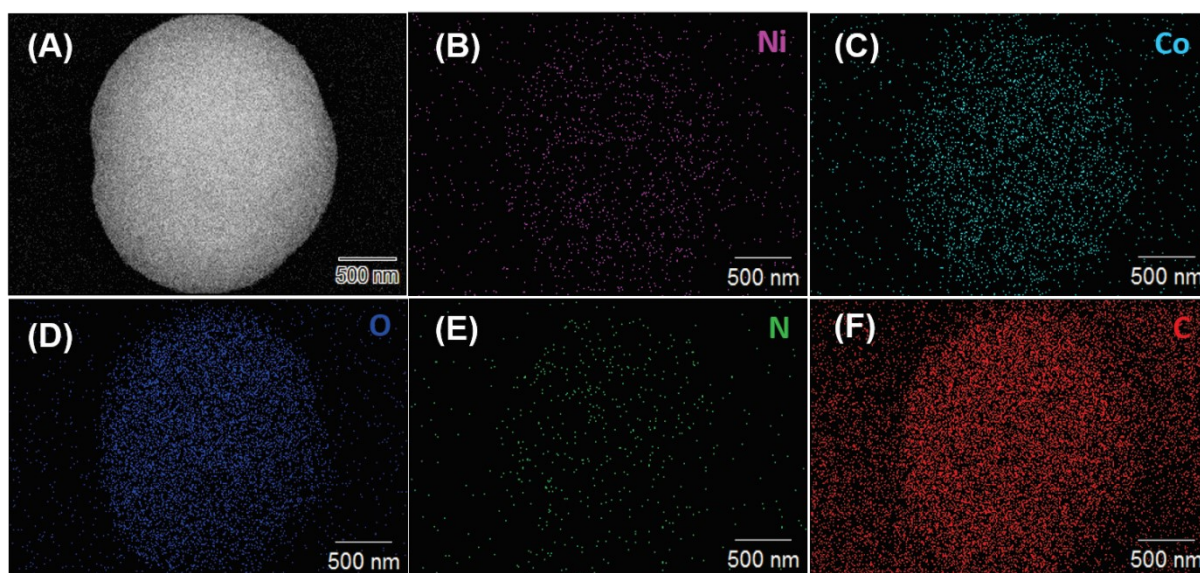

**Figure S2.** (A) FESEM images of NiCo-BTC-3 sample for elemental mapping Ni (B), Co (C), O (D), N (E), and C (F).

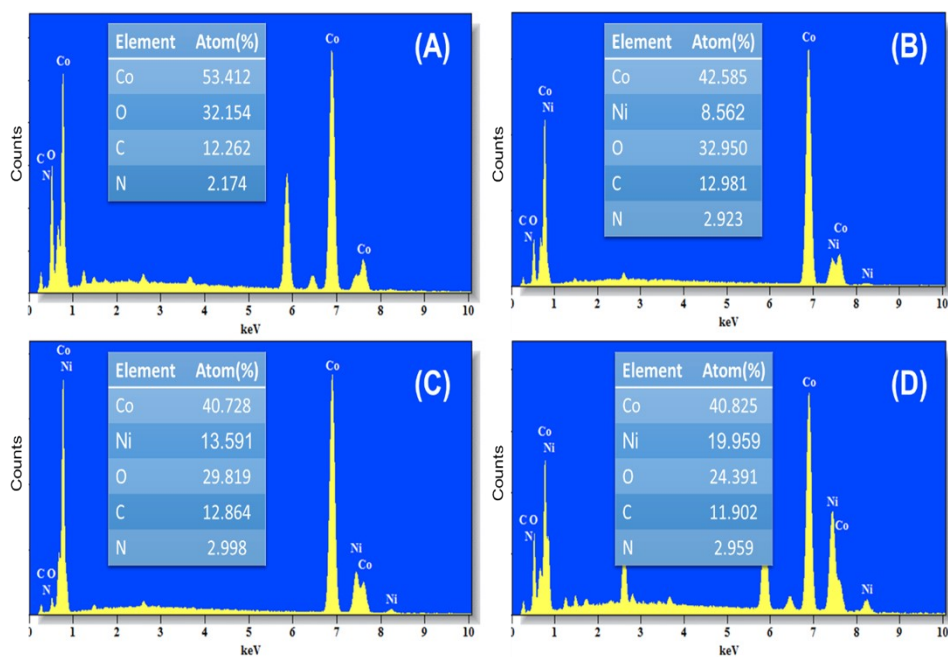

**Figure S3.** EDX spectrum of (A)  $\text{Co}_3\text{O}_4/\text{NCS}$ , (B)  $\text{Ni}_x\text{-Co}_3\text{O}_4/\text{NCS-1}$ , (C)  $\text{Ni}_x\text{-Co}_3\text{O}_4/\text{NCS-2}$ , and  $\text{Ni}_x\text{-Co}_3\text{O}_4/\text{NCS-3}$  samples.

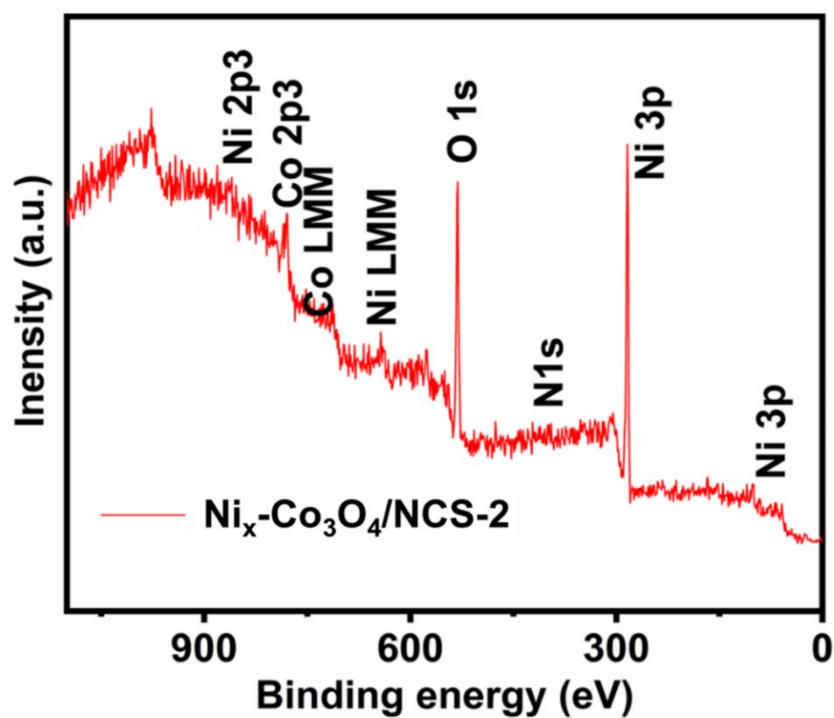

**Figure S4.** XPS survey spectrum of  $\text{Ni}_x\text{-Co}_3\text{O}_4/\text{NCS-2}$  sample.

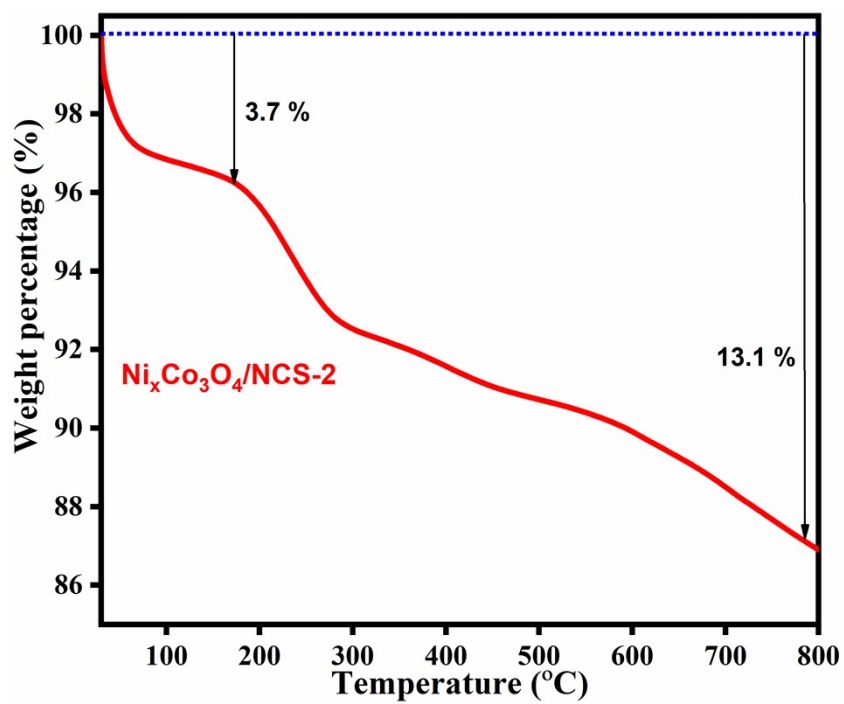

**Figure S5.** TGA curve of  $\text{Ni}_x\text{Co}_3\text{O}_4/\text{NCS-2}$  in air with a heating rate of  $5\text{ }^{\circ}\text{C min}^{-1}$

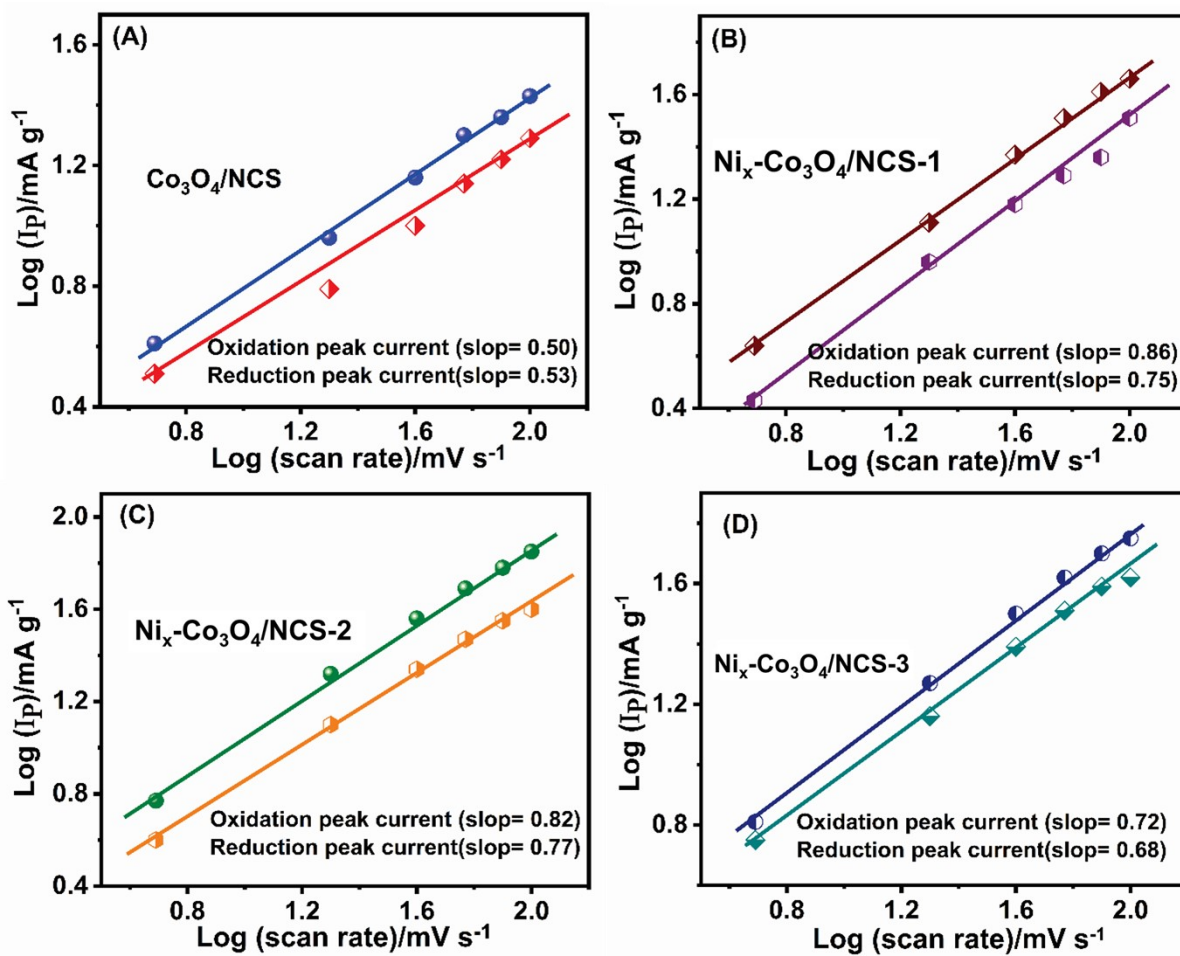

**Figure S6.**  $\log(I_p)$  vs  $\log(\text{scan rate})$  plot of (A)  $\text{Co}_3\text{O}_4/\text{NCS}$ , (B)  $\text{Ni}_x\text{-Co}_3\text{O}_4/\text{NCS-1}$ , (C)  $\text{Ni}_x\text{-Co}_3\text{O}_4/\text{NCS-2}$  and  $\text{Ni}_x\text{-Co}_3\text{O}_4/\text{NCS-3}$ .



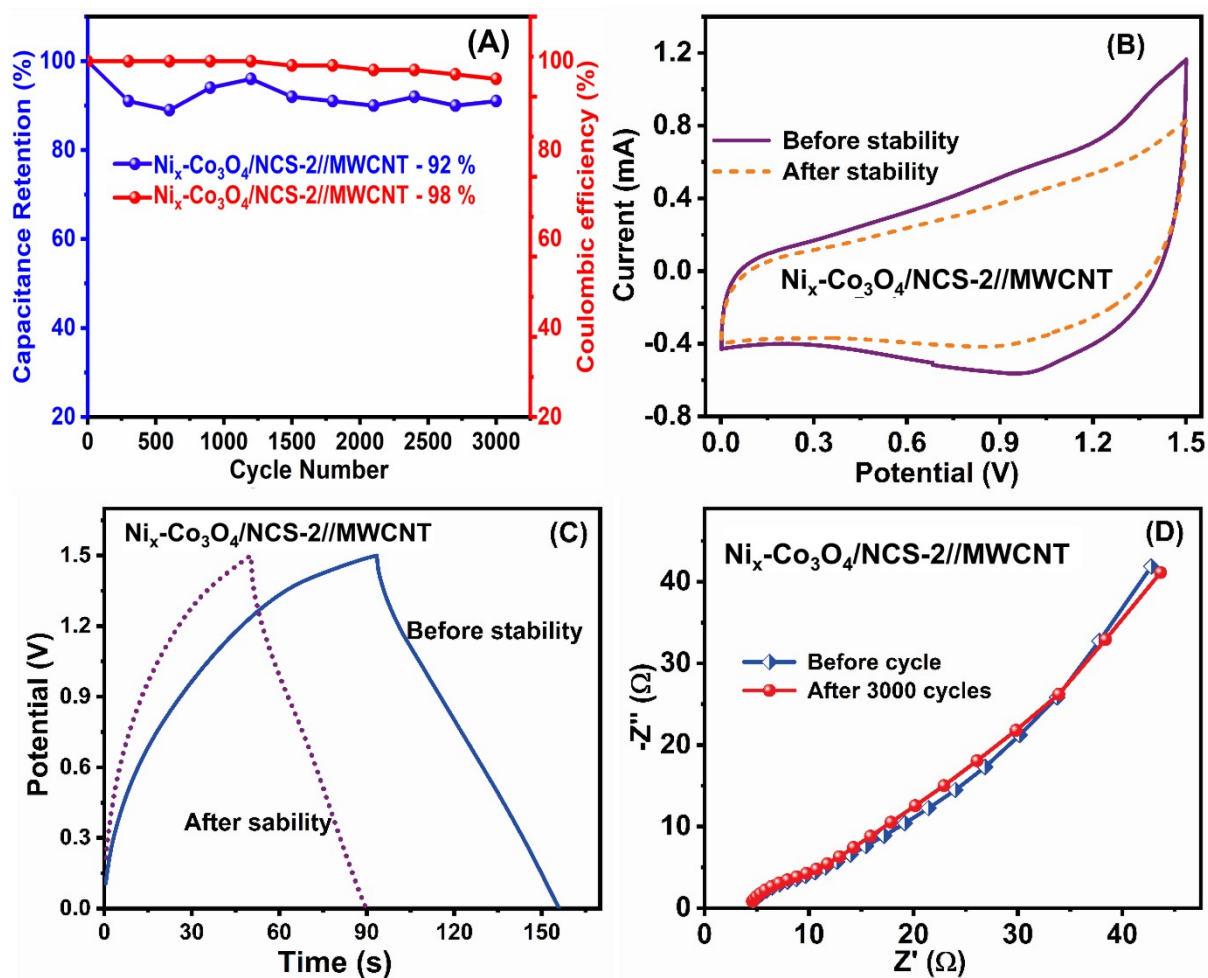

**Figure S7.** (A) the cycle stability and coulombic efficiency of  $\text{Ni}_x\text{-Co}_3\text{O}_4/\text{NCS-2//MWCNT}$  electrode performance at 3000 cycles. (B) CV profile of the before and after cycle stability. (C) GCD profile of the before and after cycle stability. (D) EIS studies of the before and after cycle stability in 1 M KOH electrolyte.
